# Supplementary material for: A mixed culture of bacterial cells enables an economic DNA storage on a large scale
Source: PubMed Central journal article supplement (PMC7395121; doi:10.1038/s42003-020-01141-7), 2020-07-31
Supplement: 42003_2020_1141_MOESM1_ESM.pdf [file 42003_2020_1141_MOESM1_ESM.pdf]

1 **SUPPLEMENTARY INFORMATION**

2 **Supplementary Figures**

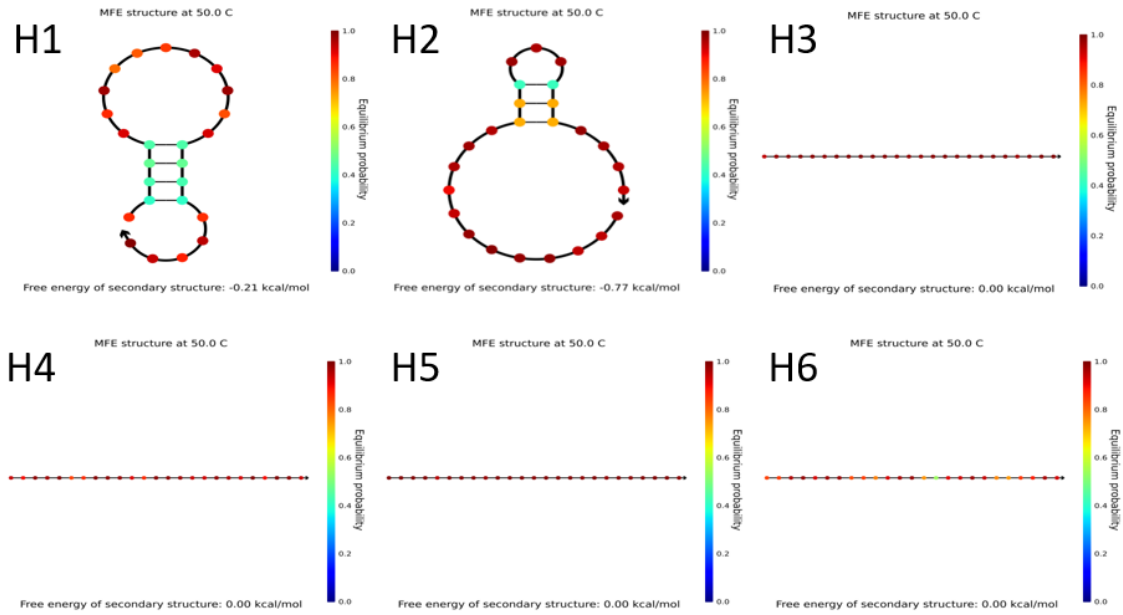

3

4 **Supplementary Figure 1.** Thermodynamic secondary structure in designed homologous arm  
5 sequence calculated by NUPACK (<http://www.nupack.org>). H1, H2 is the homologous arm  
6 with sequence from vector plasmid pUC19; H3, H4, H5 and H6, are the in silico designed  
7 sequence for homologous assembly.

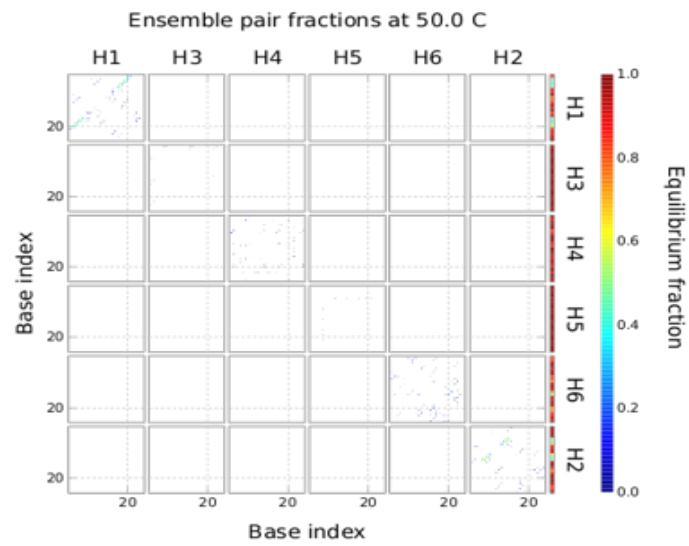

8

9 **Supplementary Figure 2.** Thermodynamic diagram for cross interaction between designed

10 homologous arm sequence assessed by NUPACK. H1, the left homologous arm on the pUC19;

11 H2, the right homologous arm on the pUC19; H3, H4, H5 and H6, the designed-homologous

12 arms.

13

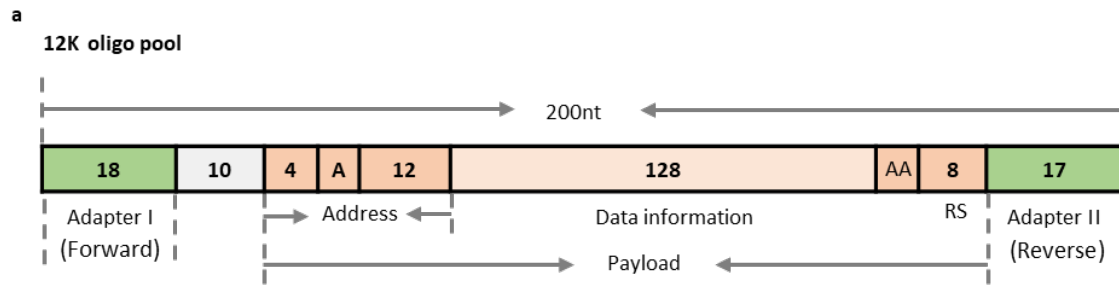

b

| Serial number | Avoided Sequences | Type   |
|---------------|-------------------|--------|
| 1             | GCGGCCGC          | Not I  |
| 2             | AGATAG            | Primer |
| 3             | TGTTGG            | Primer |
| 4             | GAGCTG            | Primer |
| 5             | AGTCTG            | Primer |
| 6             | AAAAA             | Poly A |
| 7             | TTTT              | Poly T |
| 8             | GGGG              | Poly G |
| 9             | CCCC              | Poly C |

c

| Data                              | File Size | Number of DNA strands |
|-----------------------------------|-----------|-----------------------|
| Central dogma (.jpg)              | 35 KB     | 990                   |
| DNA helix (.gif)                  | 81 KB     | 2292                  |
| China Classical literature (.txt) | 164 KB    | 4641                  |
| A Brief History of Element (.txt) | 34 KB     | 962                   |
| Panda burn incense (.rar)         | 66 KB     | 1867                  |
| Human Mitochondrial               | 65 KB     | 768                   |
| Total                             | 445KB     | 11520                 |

14

15 **Supplementary Figure 3.** The information of 11520 oligos pool.

16 (a) Structure of the oligos unit designed under the same principle of our previous study, and

17 synthesized from chip-based 12K oligo synthesis product of Twist Bio. (b) Sequences were

18 avoided in the process of encoding. (c) The list of 445 KB digital files encoded in the 11520

19 oligos pool.

| primer        | Sequence                  |           |                   |
|---------------|---------------------------|-----------|-------------------|
|               | Homologous arm            | Not I     | Primer            |
| TY-primer 1-F | TATCCCCTGATTCTGTGGATAACCG | GCGGCCGCT | GCATCACCTACCTCAGC |
| TY-primer 1-R | ACCTAACAAACCCAACAAACCCAAG | GCGGCCGCT | TCCACGACGATCAGACT |
| TY-primer 2-F | CTTGGGTTTGTGGGTTTGTAGGT   | GCGGCCGCT | GCATCACCTACCTCAGC |
| TY-primer 2-R | GTTATCCGGTCTTGCTTTACTCTGT | GCGGCCGCT | TCCACGACGATCAGACT |
| TY-primer 3-F | ACAGAGTAAAGCAAGACCGGATAAC | GCGGCCGCT | GCATCACCTACCTCAGC |
| TY-primer 3-R | TATAAAAATAGGCGTATCACGAGGC | GCGGCCGCT | TCCACGACGATCAGACT |

20

21 **Supplementary Figure 4.** The primer sequence for 11520 oligos pool insert fragment  
 22 construction. Homologous arm sequence was indicted in black, *Not* I cleavage site in blue and  
 23 primer sequence in purple (forward) and orange (reverse).

24

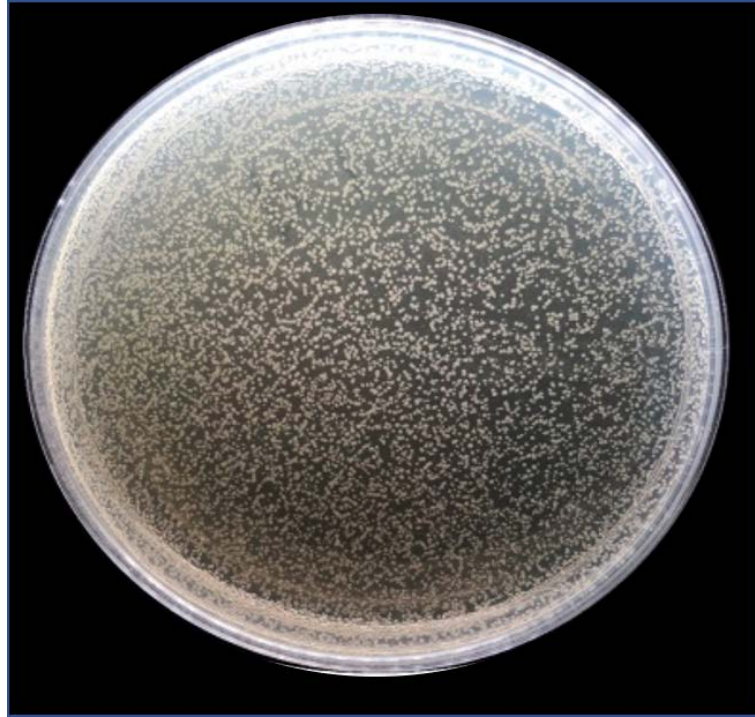

25

26 **Supplementary Figure 5.** One petri-dish of solid medium for one insert fragment (1F)  
27 assembly of 509 oligos pool, the colony number was counted from all the solid medium plates.

28

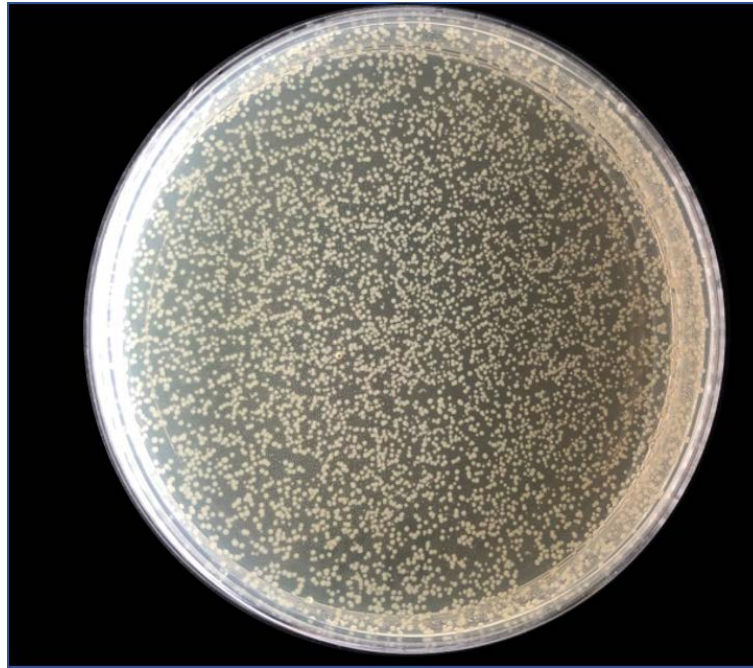

29

30 **Supplementary Figure 6.** One petri-dish of solid medium for one insert fragment (3F)

31 assembly of 509 oligos pool, the colony number was counted from all the solid medium plates.

32

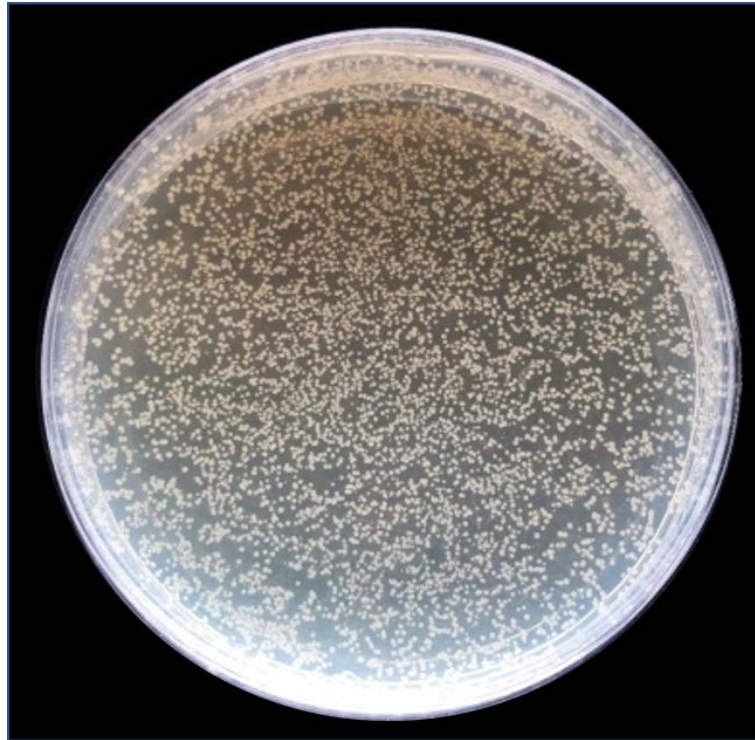

33

34 **Supplementary Figure 7.** One petri-dish of solid medium for one insert fragment (5F)  
35 assembly of 509 oligos pool, the colony number was counted from all the solid medium plates.

36

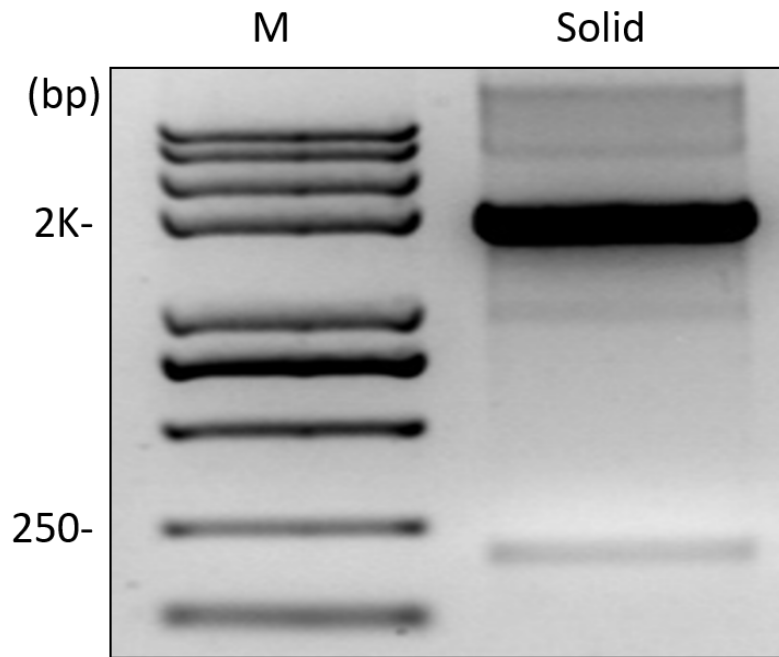

37

38 **Supplementary Figure 8.** Digestion of 1F assembly plasmids by *Not* I (509 oligos pool). M,  
39 2K plus II DNA marker; Solid, cultured on LB plate medium.

40



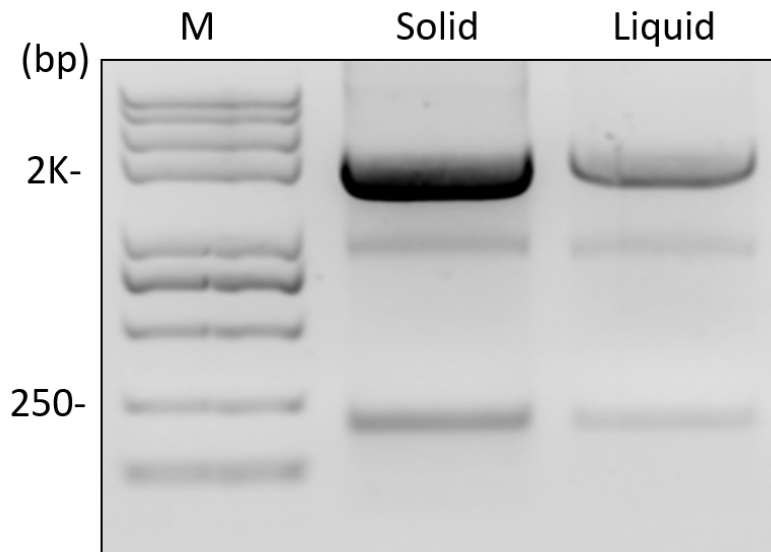

41

42 **Supplementary Figure 9.** Digestion of 3F assembly by *Not* I (509 oligos pool). M, 2K plus II

43 DNA marker; Solid, cultured on LB plate medium; Liquid, cultured In LB liquid medium.

44

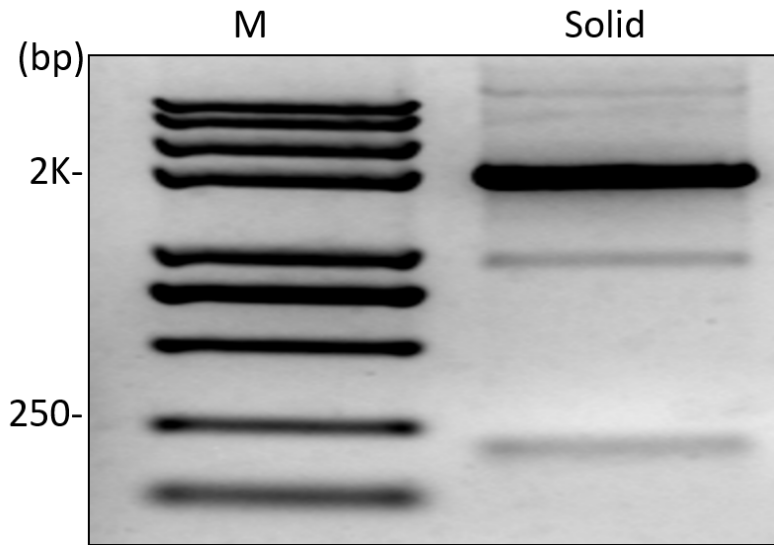

45

46 **Supplementary Figure 10.** Digestion of 5F self-assembly by *Not* I (509 oligos pool). M, 2K  
47 plus II DNA marker; Solid, cultured on LB plate medium.

48

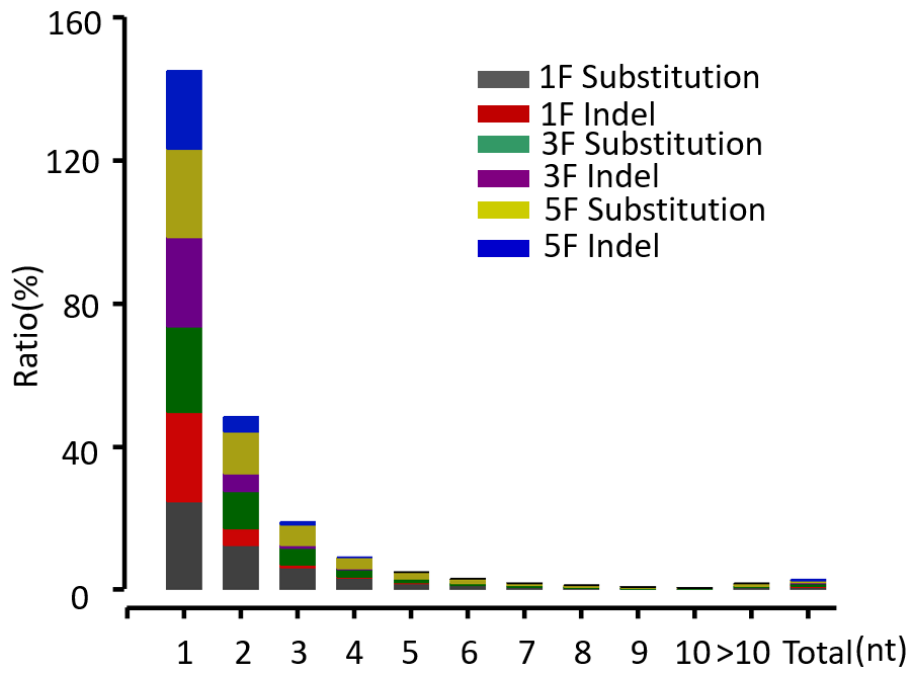

49

50 **Supplementary Figure 11.** Sequenced reads with base error (substitution or indel) were sorted

51 out and the ration of reads with various number of base errors was calculated for assembly of

52 509 oligos pool.

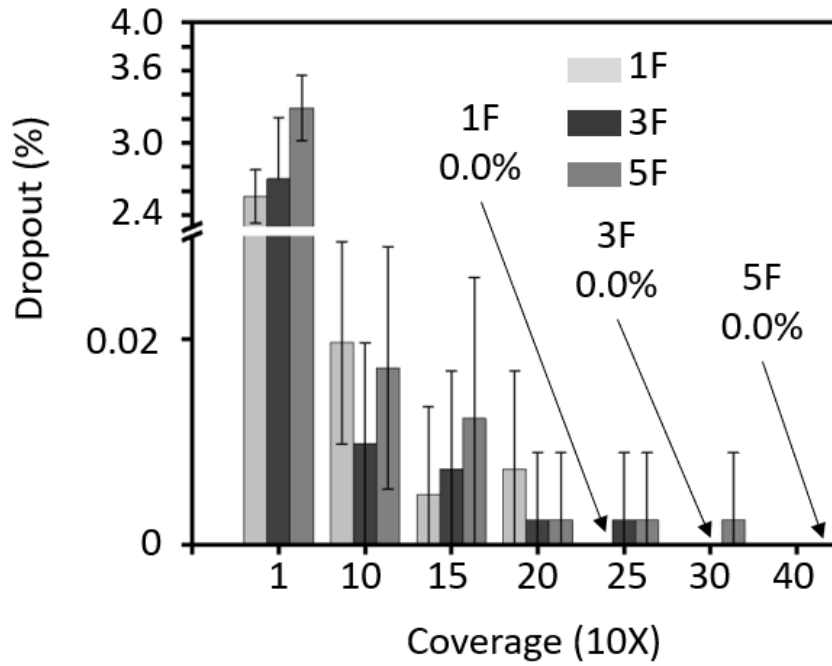

53

54 **Supplementary Figure 12.** The dropout of 1F, 3F and 5F assembly of 509 oligos pool in solid  
 55 medium culture. When down-sampling the sequencing reads number to 250x of original oligo  
 56 pool, the dropout of 1F was 0%; When down-sampling the sequencing reads to 300x, the  
 57 dropout of 3F was 0%; When down-sampling the sequencing reads to 400x, the dropout of 5F  
 58 was 0%. The position of 0% was indicated by arrow. Error bars represent the SD, where n =10.

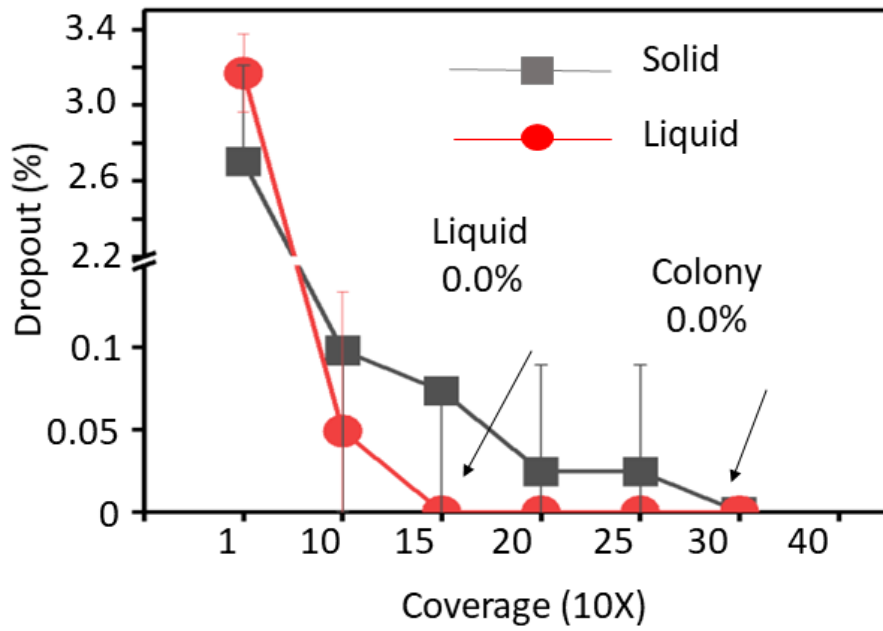

59

60 **Supplementary Figure 13.** The dropout of 3F assembly of 509 oligos pool in solid or liquid  
 61 culture. When down-sampling the sequencing reads to 150x, the dropout of liquid culture was  
 62 0% and down-sampling the sequencing reads to 300x, the dropout of solid culture was 0%. The  
 63 arrow indicates the position where dropout of each sample is 0%. Error bars represent the SD,  
 64 where n =10.

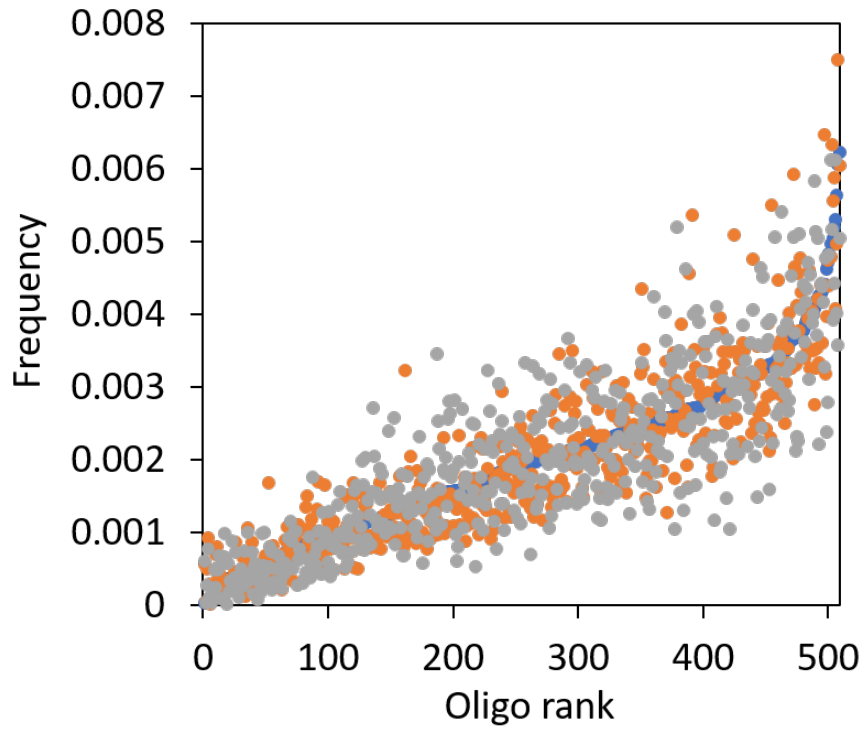

65

66 **Supplementary Figure 14.** Sequenced reads frequency of each 509 oligos reference, for one  
67 insert fragment (1F, Blue) assembly, three fragments (3F, orange) assembly and five fragments  
68 (5F, gray) assembly.

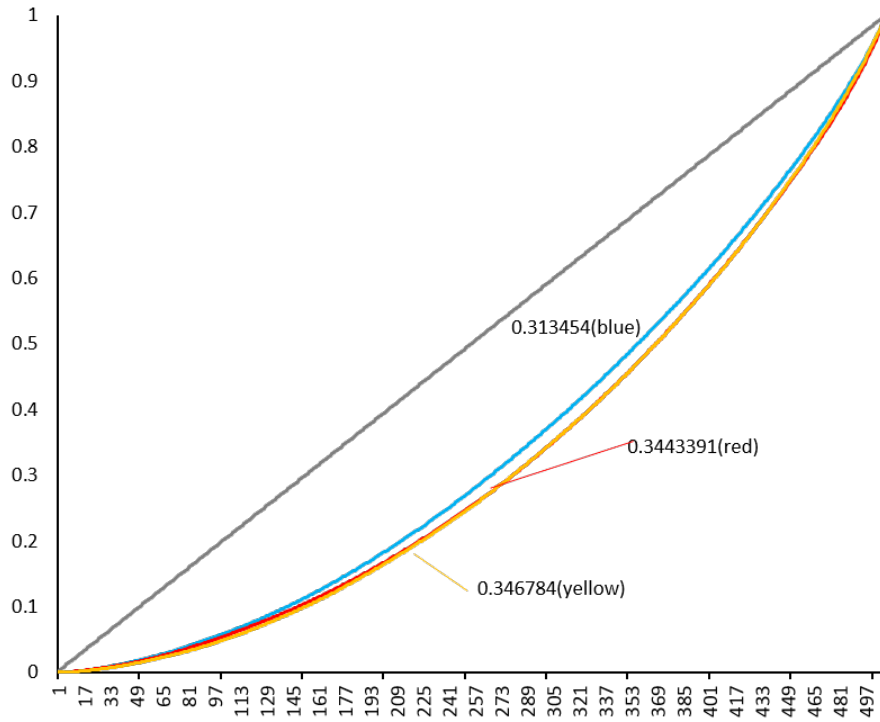

69

70 **Supplementary Figure 15.** Lorenz curve of Gini coefficient for recovered oligos of 1F (blue,  
 71 with a Gini of 0.313454), 3F (Red with a Gini of 0.3443391) and 5F (Orange with a Gini of  
 72 0.346784) assembly of 509 oligos pool.

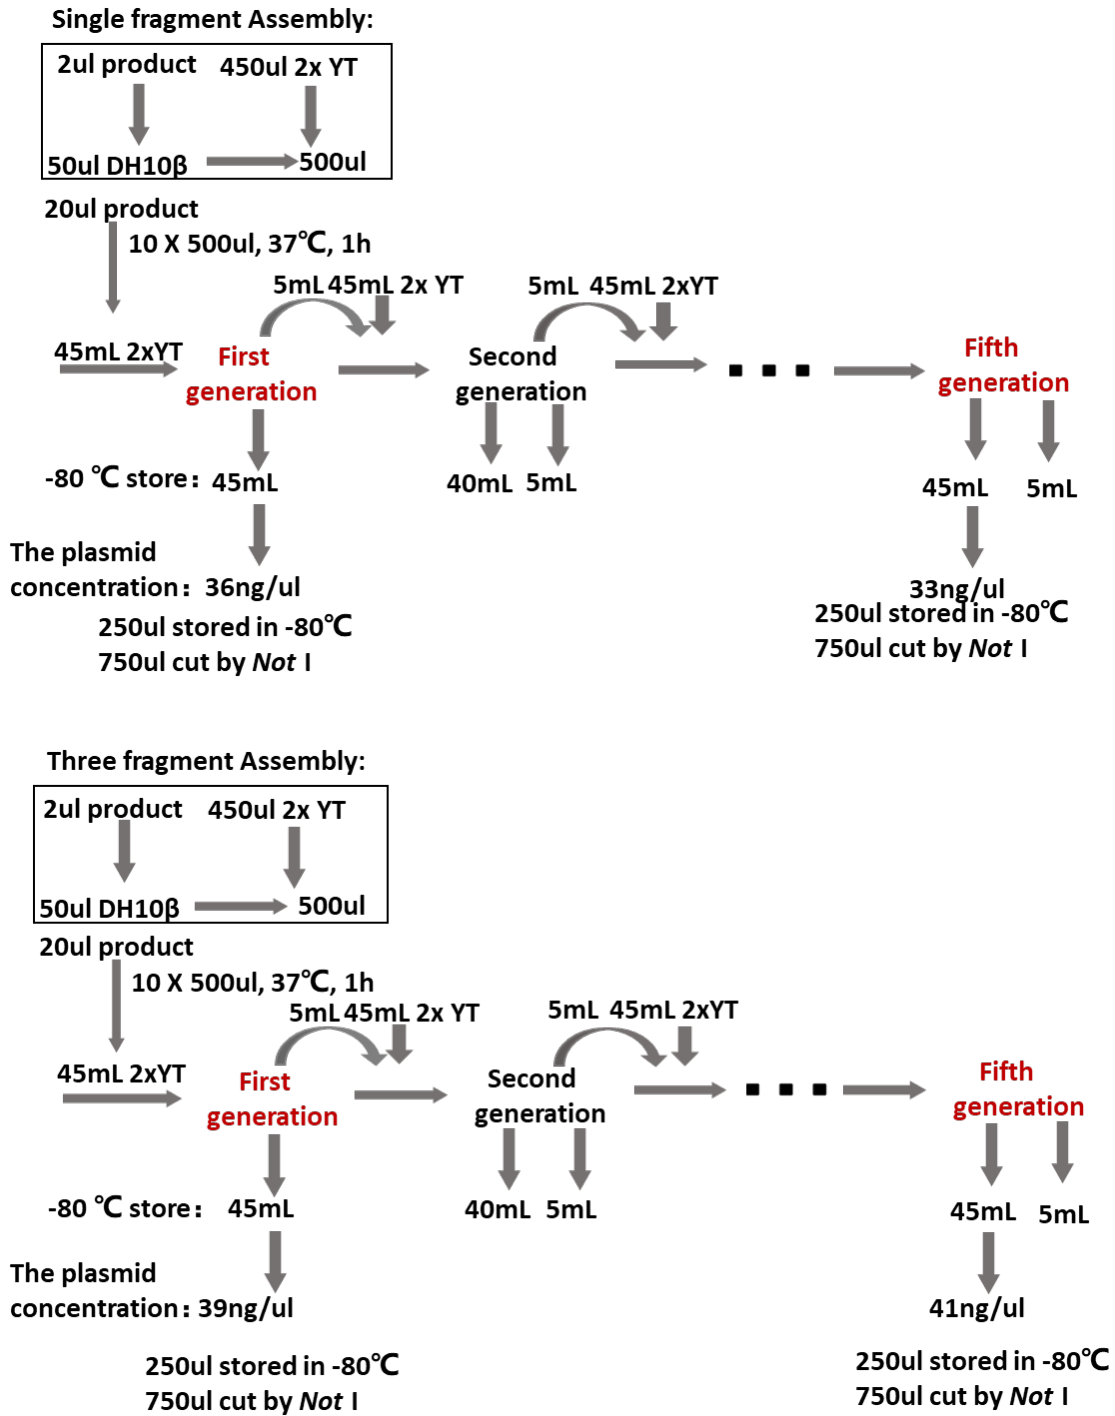

73

74 **Supplementary Figure 16.** The workflow for 11520 oligos pool assembly for mixed culture

75 in liquid medium. The plasmid concentration indicates the extracted plasmid after culture.



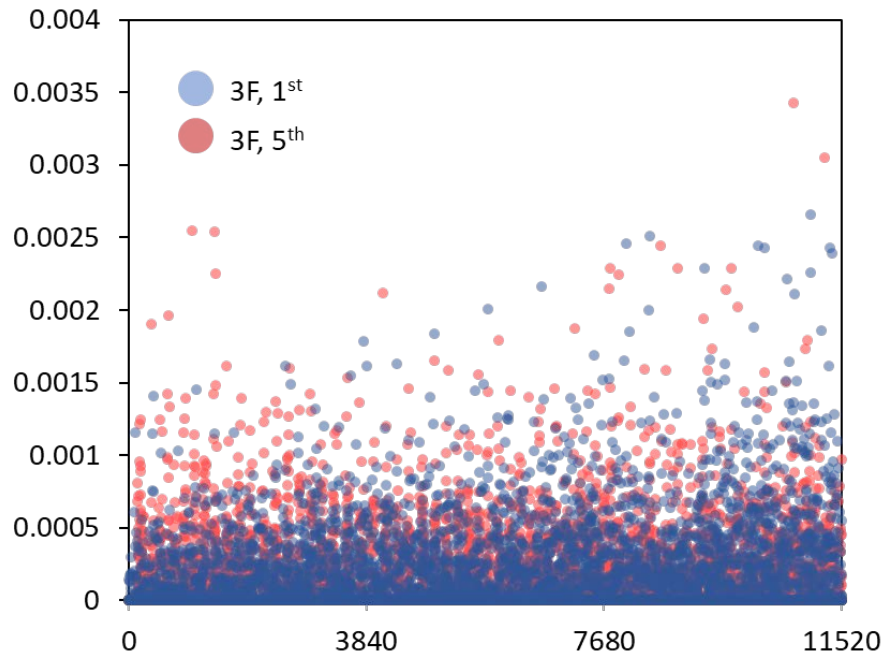

76

77 **Supplementary Figure 17.** The sequenced reads frequency of each 11520 oligos reference of

78 the 1<sup>st</sup> passaging of three insert fragment (3F 1<sup>st</sup>, red dot) and the 5<sup>th</sup> passaging (3F 5<sup>th</sup>, blue

79 dot).

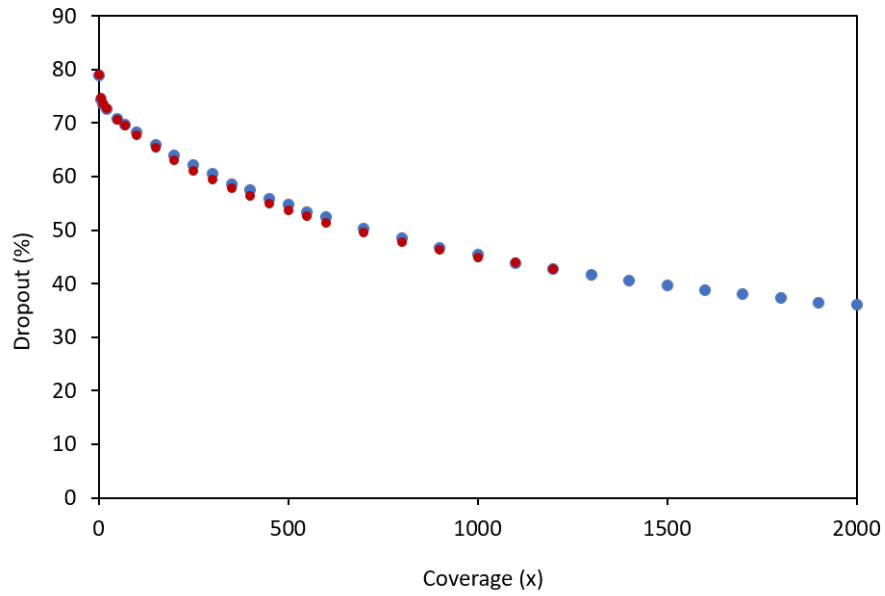

80

81 **Supplementary Figure 18.** Oligo dropout rate was plotted to the corresponding sequencing

82 reads depth. The 1<sup>st</sup> passaging of three fragment assembly (3F 1<sup>st</sup>, blue) and the 5<sup>th</sup> passaging

83 (3F 5<sup>th</sup>, red).

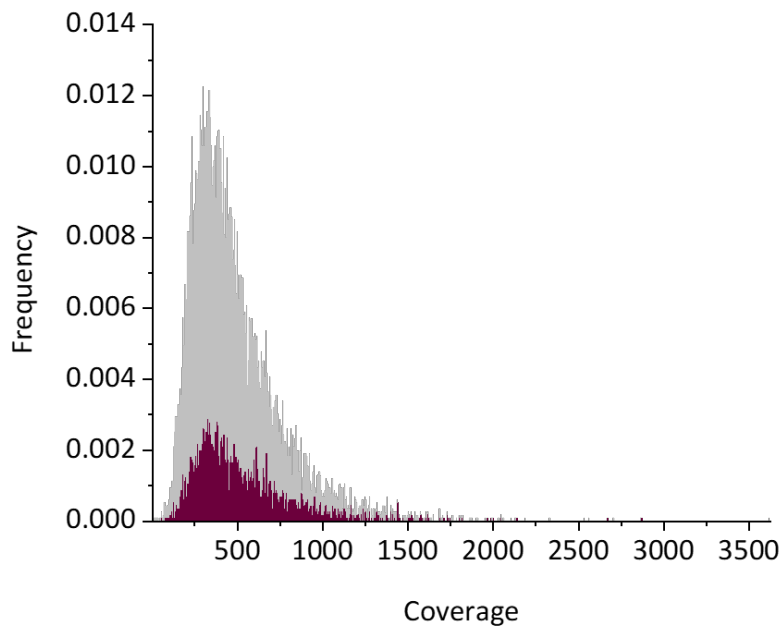

84

85 **Supplementary Figure 19.** The oligo group (red line) which dropout from the 1<sup>st</sup> passaging of  
86 three fragment assembly sample was mapped to the oligos frequency distribution of original  
87 master oligo pool (gray line).

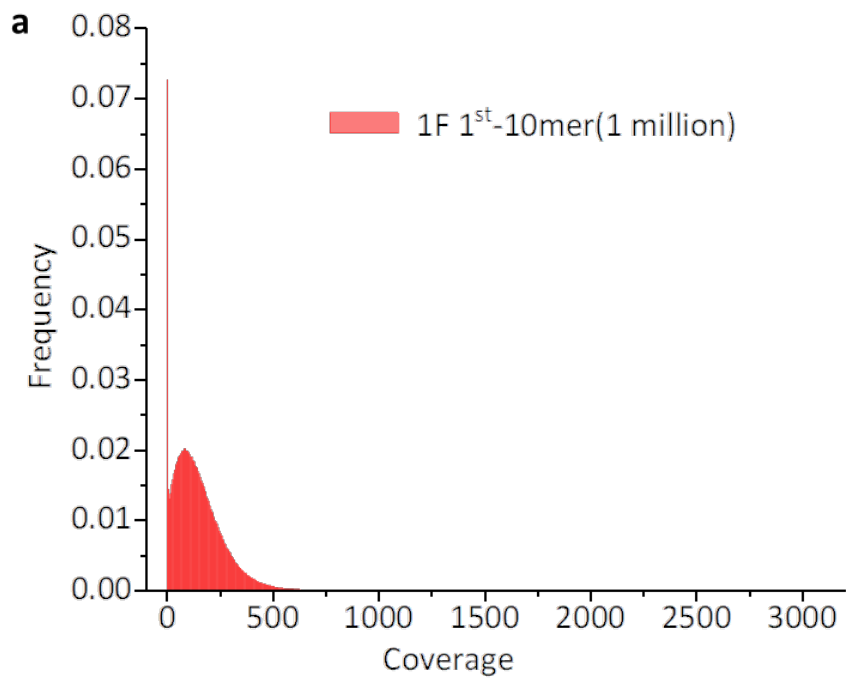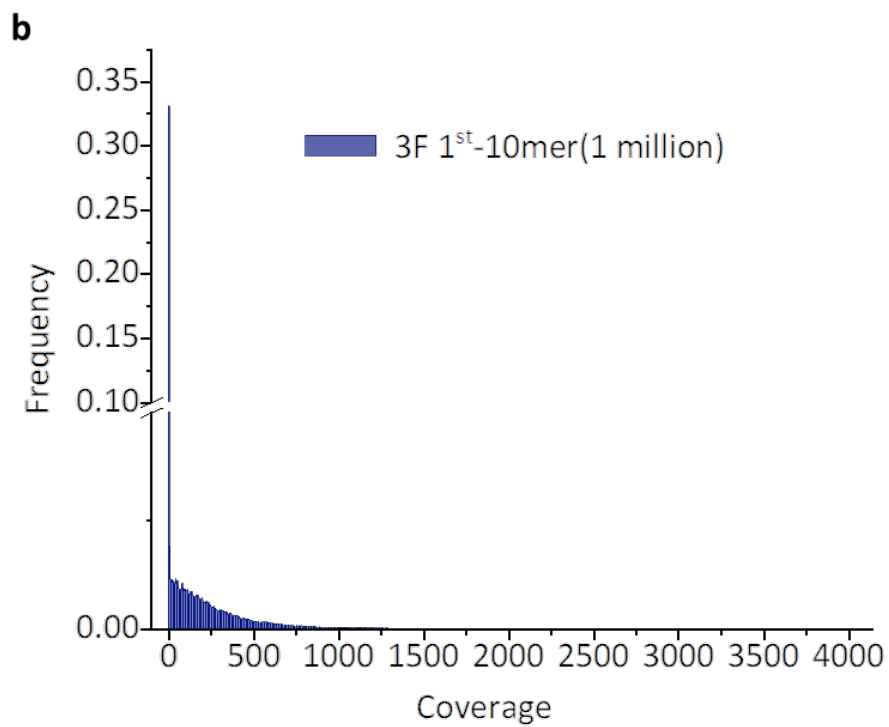

88

89 **Supplementary Figure 20.** 10-mers nucleotide pattern frequency distribution of 1 million

90 valid sequencing reads from sample of 1F 1<sup>st</sup> (a) and 3F 1<sup>st</sup> (b).

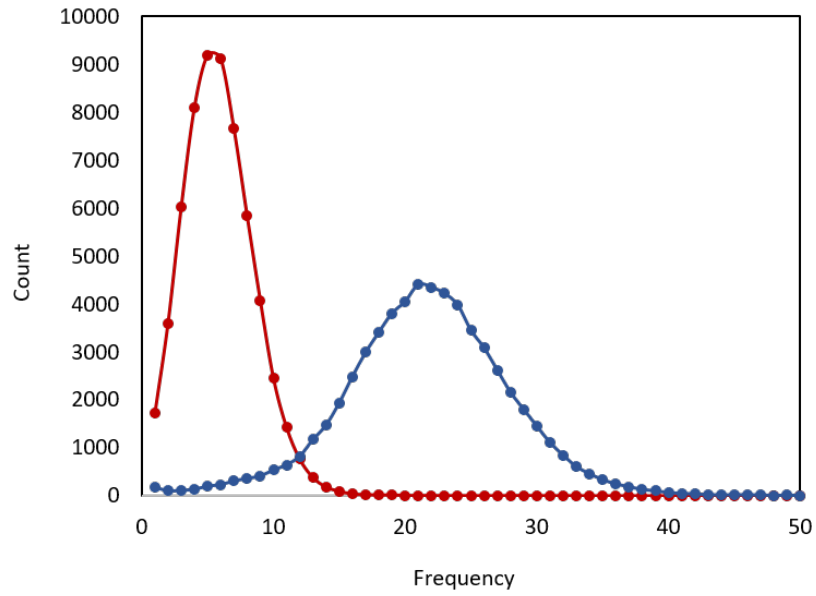

91

92 **Supplementary Figure 21.** 10-mers frequency of three fragment assembly of 11520 oligos

93 pool. Red: enriched oligos, Blue: deprived oligos in comparing with 1F 1<sup>st</sup>.

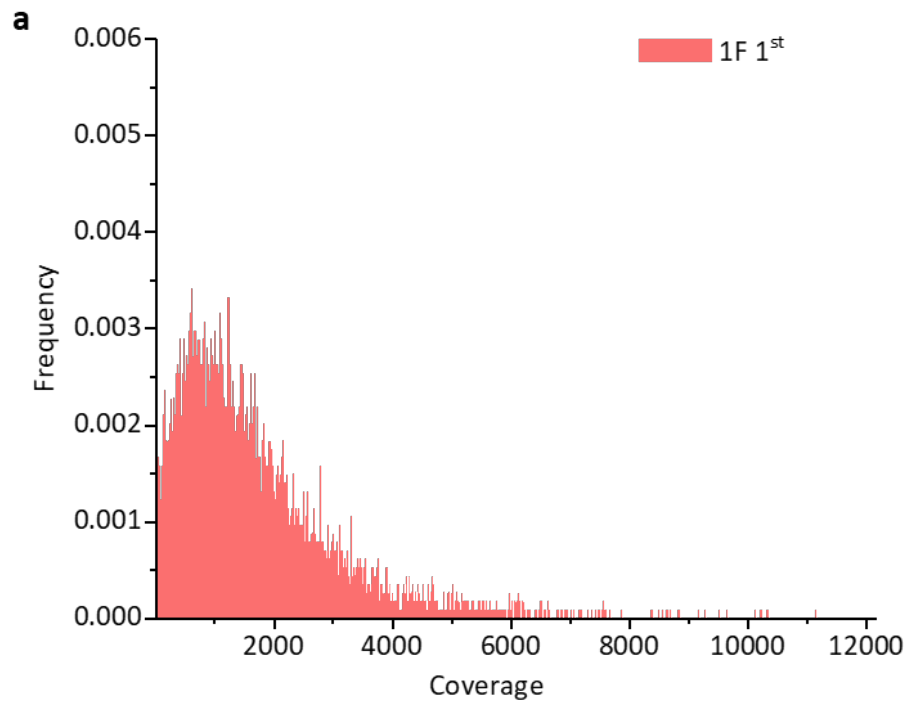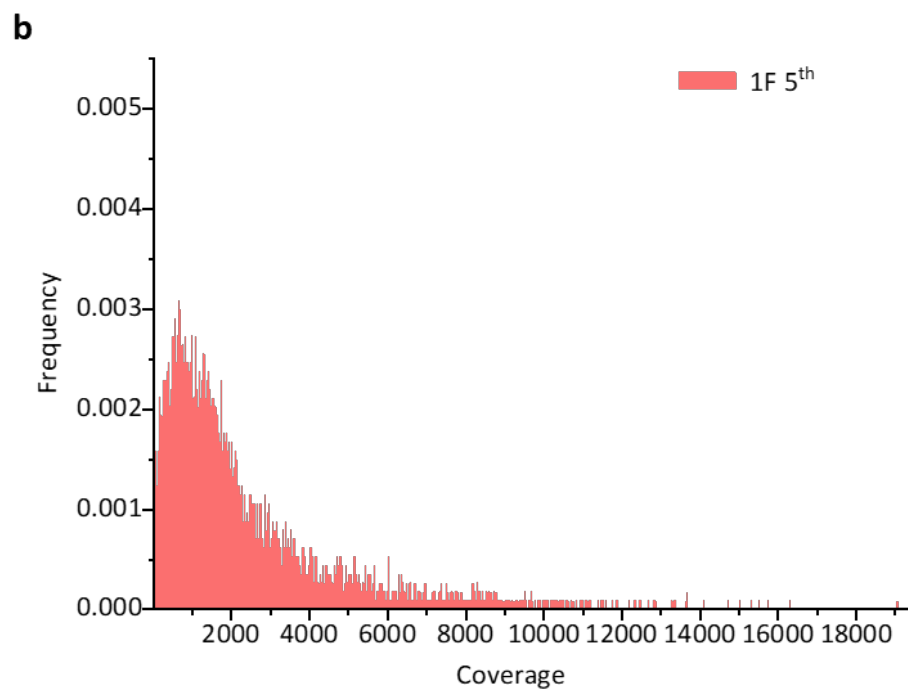

94

95 **Supplementary Figure 22.** Oligo frequency distribution of retrieved oligos from the 1<sup>st</sup>  
96 passaging of one insert fragment assembly (1F 1<sup>st</sup>, a) and the 5<sup>th</sup> passaging (1F 5<sup>th</sup>, b) of 11520  
97 oligos pool.

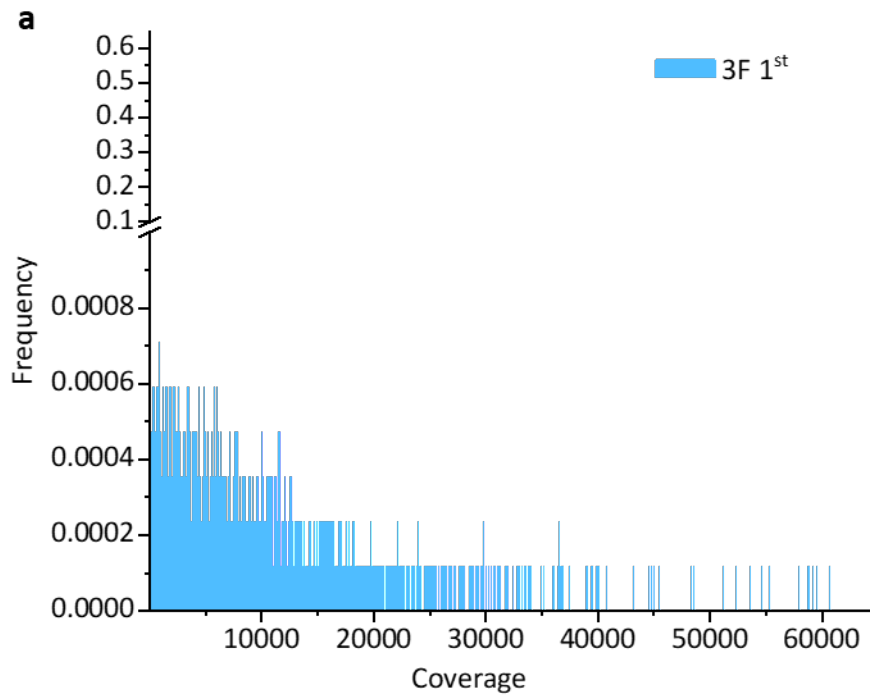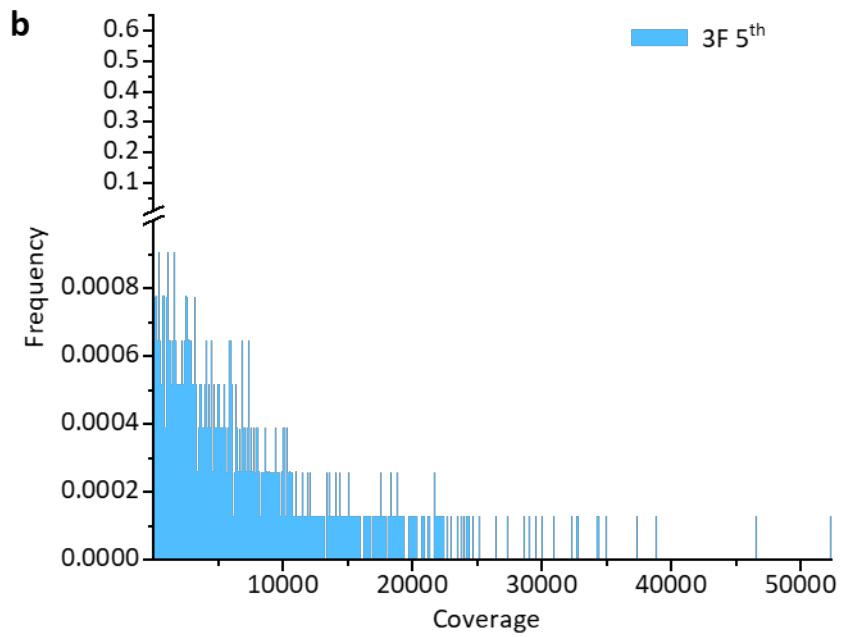

98

99 **Supplementary Figure 23.** Oligo frequency distribution of retrieved oligos from the 1<sup>st</sup>

100 passaging of three insert fragment assembly (3F 1<sup>st</sup>, a) and the 5<sup>th</sup> passaging (3F 5<sup>th</sup>, b) of 11520

101 oligos pool.

102

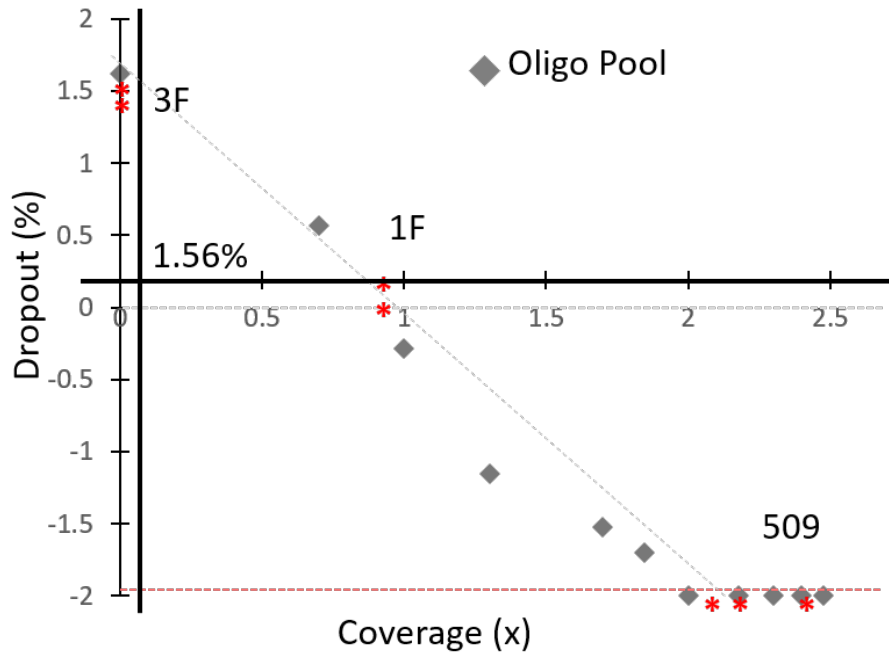

103

104 **Supplementary Figure 24.** Dropout was plotted to corresponding sequencing reads depth. The  
 105 dropout rate of 11520 master pool was plotted to the corresponding sequencing reads depth  
 106 (gray diamond) and the dropout rate (red star) of one fragment 11520 oligos assembly sample  
 107 (1F), three fragments 11520 oligos assembly sample (3F) and all 509 oligos assembly sample  
 108 respectively were mapped in the dropout rate curve.

109



110 **Supplementary Tables**111 **Supplementary Table 1. Sequence information of primers.**

| Primer name      | Sequence (5'→3')                                          | For oligo pool    |  |
|------------------|-----------------------------------------------------------|-------------------|--|
| F01              | TCACCATCCACTCTAAACAC                                      | 509 oligos pool   |  |
| R01              | CACTTTACACCTCCACTCAT                                      |                   |  |
| F02              | ACCCTCACCTATCAACTCAA                                      |                   |  |
| R02              | CTTCCGACCACTATACCTCT                                      |                   |  |
| F03              | ACTCCCACCTCACCTATATCC                                     |                   |  |
| R03              | ATAACCTCACTCACCTACCA                                      |                   |  |
| F04              | ACTCTCACCTTTACTCCCAC                                      |                   |  |
| R04              | CTACTCCCACCTACTACCACA                                     |                   |  |
| 1-F              | TATCCCCTGATTCTGTGGATAACCGGCGGCCGCACCCTCACCT<br>ATCAACTCAA |                   |  |
| 1-R              | ACCTAACAAACCCAACAAACCCAAGGCGGCCGCCTTCCGAC<br>CACTATACCTCT |                   |  |
| 2-F              | CTTGGGTTTGTGGGTTTGTAGGTGCGGCCGCACCCTCACC<br>TATCAACTCAA   |                   |  |
| 2-R              | GTTATCCGGTCTTGCTTTACTCTGTGCGGCCGCCTTCCGACCA<br>CTATACCTCT |                   |  |
| 3-F              | ACAGAGTAAAGCAAGACCGGATAACGCGGCCGCACCCTCAC<br>CTATCAACTCAA |                   |  |
| 3-R              | TCCCACACACCCACCCAACCTACAAGCGGCCGCCTTCCGACC<br>ACTATACCTCT |                   |  |
| 4-F              | TTGTAGGTTGGGTGGGTGTGTGGGAGCGGCCGCACCCTCACC<br>TATCAACTCAA |                   |  |
| 4-R              | ATAGATTTCCATTACTCACCGCTTGGCGGCCGCCTTCCGACCA<br>CTATACCTCT |                   |  |
| 5-F              | CAAGCGGTGAGTAATGGAAATCTATGCGGCCGCACCCTCACC<br>TATCAACTCAA |                   |  |
| 5-R              | TATAAAAATAGGCGTATCACGAGGCGCGGCCGCCTTCCGACC<br>ACTATACCTCT |                   |  |
| PCR-<br>pUC19-F  | GCCTCGTGATACGCCTATTT                                      |                   |  |
| PCR-<br>pUC19-R  | CGGTTATCCACAGAATCAGG                                      |                   |  |
| F1               | TGCATCACCTACCTCAGC                                        | 11520 oligos pool |  |
| R1               | TCCACGACGATCAGACT                                         |                   |  |
| TY-primer<br>1-F | TATCCCCTGATTCTGTGGATAACCGGCGGCCGCTGCATCACCT<br>ACCTCAGC   |                   |  |

|                  |                                                         |  |
|------------------|---------------------------------------------------------|--|
| TY-primer<br>1-R | ACCTAACAAACCCAACAAACCCAAGGCGGCCGCTCCACGAC<br>GATCAGACT  |  |
| TY-primer<br>2-F | CTTGGGTTTGTGGGTTTGTAGGTGCGGCCGCTGCATCACCT<br>ACCTCAGC   |  |
| TY-primer<br>2-R | GTTATCCGGTCTTGCTTTACTCTGTGCGGCCGCTCCACGACGA<br>TCAGACT  |  |
| TY-primer<br>3-F | ACAGAGTAAAGCAAGACCGGATAACGCGGCCGCTGCATCAC<br>CTACCTCAGC |  |
| TY-primer<br>3-R | TATAAAAATAGGCGTATCACGAGGCGCGGCCGCTCCACGACG<br>ATCAGACT  |  |

112

113

114 **Supplementary Table 2.** The Gini Coefficient of each sample with 11520 oligos pool.

| Sample             | Gini Coefficient |
|--------------------|------------------|
| Master Pool        | 0.29             |
| 1F 1 <sup>st</sup> | 0.41             |
| 1F 5 <sup>th</sup> | 0.48             |
| 3F 1 <sup>st</sup> | 0.87             |
| 3F 5 <sup>th</sup> | 0.87             |

115

116 Note: Gini coefficient of retrieved oligos for each assembled mixed culture of 11520 oligos

117 pool, master pool is the original oligo pool from chip-based synthesis and amplified by PCR.

118

119 **Supplementary Table 3.** The data statistics for oligo retrieved from 1F or 3F with 11520 oligos  
120 pool by direct *Not* I digest or PCR amplification.

| Sample                          | Dropout Rate | Coverage | Perfect Decoding |
|---------------------------------|--------------|----------|------------------|
| 1F 1 <sup>st</sup> <i>Not</i> I | 0.90%        | 1472x    | Yes              |
| 1F 5 <sup>th</sup> <i>Not</i> I | 1.40%        | 1900x    | Yes              |
| 1F 1 <sup>st</sup> PCR          | 0.40%        | 2928x    | Yes              |
| 1F 5 <sup>th</sup> PCR          | 1.40%        | 2399x    | Yes              |
| 3F 1 <sup>st</sup> <i>Not</i> I | 26.50%       | 2101x    | No               |
| 3F 5 <sup>th</sup> <i>Not</i> I | 32.80%       | 1325x    | No               |
| 3F 1 <sup>st</sup> PCR          | 25.00%       | 2797x    | No               |
| 3F 5 <sup>th</sup> PCR          | 71.70%       | 2720x    | No               |

121

122 Note: The values of dropout rate in the gold box are less than 1.56%, corresponding samples

123 can be decoded perfectly. The values in the light blue box are over 1.56% and less than 50%,

124 they cannot be decoded. The value in the blue box is over 50%, the sample cannot be decoded.

125

126 **Supplementary Notes**

127 **Supplementary Note 1. BASIC Code**

128 Gene coding is a new type of distributed storage system. In this work, we use the BASIC Code,  
129 it is a kind of distributed erasure code designed for gene coding, aiming at maximizing storage  
130 utilization, effectively guaranteeing the reliability of the storage system. Due to the adjustable  
131 system parameters  $K$  and  $L$ , we take the standard system parameters ( $K = 252$ ,  $L = 256$ ) as an  
132 example. Here, we use 11,520 DNA sequences (12K oligo pool) of length 200 nt with payload  
133 of length 155 nt to store 445 KB data (Supplementary Fig. 3).

134

135 **Supplementary Note 2. Encoding and Decoding Process**

136 **Encoding process.** The goal of this work is to transform the input file to DNA sequence reads  
137 (within biochemical constraints). DNA BASIC Code should enable error-detection, error-  
138 correction and full recovery. There are mainly steps: (a) erasure coding, (b) RS coding. (c)  
139 filtering. Since the sequence reads need to satisfy the biochemical constraints, both (a) and (b)  
140 include the step of filtering the sequences.

141 **Decoding process.** The decoding process is processed step by step in reverse by the encoding  
142 process. XOR processing is performed according to the mapping table to restore the RS code,  
143 and then the RS code is used for error correction to ensure that existing information of each  
144 sequence is accurate. Restore the BASIC code sequence. For each group of data information,  
145 decode according to the BASIC decoding algorithm.

146

147 **Supplementary Note 3. Cost calculation**

148 In this study, the cost of practical implementation of DNA storage in vivo was \$0.001 per base,  
149 which was consisted of four parts: DNA synthesis, the DNA library was synthesized from Twist  
150 Bioscience and CustomArray, and the cost about \$ 0.0009 per base; Assembly, this part was  
151 contained PCR and assembly, the cost around \$ 58 during an experiment; Transformation, the  
152 cost of 509 oligos and 11520 oligos was \$ 9 and \$ 90, respectively; Recovery, which was mainly  
153 included plasmid extraction, enzyme digestion and sequencing.

154

155 **Supplementary Note 4. The bioinformatic statistical analysis.**

156 We stitched the reads pair by using PEAR to get the sequenced reads.

157 The sequenced reads were aligned with the actual sequences (synthesized by Twist Bioscience  
158 and CustomArray) by basic sequence alignment program (BLAST). The coverage and number  
159 could be achieved by Valid\_Coverage\_Number.pl. The frequency was calculated via the  
160 number dividing by total number of actual sequences. Then the distribution of number of reads  
161 per each actual sequence was displayed (Fig. 4b, [Supplementary Figs 19, 22 and 23](#)).

162 Valid DNA sequence named payload obtained by Obtain\_Payload.pl and kmer of these payload  
163 sequences were analyzed by kmer.pl ([Supplementary Figs 20 and 21](#)).

164 The number of each sequence of the sequenced reads could be achieved by  
165 Valid\_Coverage\_Number.pl. The oligo frequency was obtained through the number of each  
166 sequence dividing by the sum of these numbers and the distribution of oligo frequency could  
167 be displayed ([Fig. 3b and 3d](#), [Supplementary Figs. 14 and 17](#)). The Gini coefficient was  
168 calculated by R ([Fig. 3e](#), [Supplementary Figs. 15 and Supplementary Table 2](#)).

169



170 **Supplementary Note 5. Genome blast**

171 **Genomic contamination rate (%)**. The sequences with high similarity to the actual sequences  
172 were removed by `unmatch_test.pl`. The remaining sequences were aligned with the genomic  
173 sequences of DH10 $\beta$  (from the competent cell used in this work) by BLAST to obtain the  
174 unmatched sequence reads (namely genomic contamination reads), and genomic contamination  
175 rate was calculated via the unmatched sequence reads dividing by the total sequenced reads  
176 (Genomic contamination reads% of [Table 1](#)). In this work, the default threshold set at blast is  
177 e-value  $10^{-6}$ . The smaller the e-value, the higher the similarity according to NCBI. At the same  
178 time, the actual sequences were also aligned with the genomic sequences by BLAST (e-value  
179  $10^{-6}$ ), but there was no output. Then the actual sequences were aligned with the genomic  
180 sequences by blast on NCBI, the output result was: No significant similarity found.

181

182 **Supplementary Note 6. Calculating error rate and dropout (%).**

183 All sequenced reads were aligned with the actual reference sequences by BLAST to screen out  
184 the reads with errors containing substitution, insertion, and deletion (hereinafter referred to as  
185 “errors”) on the payload of a single sequence. The number of reads with an error, two errors,  
186 three errors, ....., ten errors, more than ten errors in individual sequences were counted in  
187 detail by Mismatch\_Analysis.pl and Gap\_Analysis.pl, and the frequency were calculated  
188 through the number of these reads dividing by the total number of noisy reads (Fig. 2c, **Table**  
189 **1**, Supplementary Fig. 11).

190 Dropout was calculated by Vaild\_Coverage\_Number.pl, Random\_Access.pl and Dropout.pl  
191 (Fig. 2d, **Fig. 3c**, Supplementary Figs. 12, 13, 18, **24**). According to our encoding strategy  
192 which allows a maximum of 4 DNA sequences to be lost or corrupted in each group (each  
193 group contains 256 DNA sequences), the redundancy can be calculated ideally as:  
194  $4/256=1.56\%$ .

195

196 **Supplementary Note 7. Calculating of storage size**

197 The data of Fig. 4c was calculated from corresponding references, the detail was shown as  
198 follow: In 2007, Nozomu Yachie et al. has been inserted redundantly oligonucleotide (C1, C2,  
199 C3 and C4) into multiple loci of the *Bacillus subtilis* genome. The size of C1 was 64 nt, C2, C3  
200 and C4 were 62 nt, respectively. We calculated the total base is 0.25 Kbps.; In 2017, Seth L  
201 Shipman et al. has been encoded images and a short movie into the genomes of a population  
202 of living bacteria. The short movie was encoded by five frames of Eadweard Muybridge's  
203 Horse in Motion. Each Frame was represented by a unique oligo set of 104 protospacers, and  
204 each protospacer included 28 bases. We calculated the total base is 14.56 Kbps. In 2019, Jian  
205 Sun et al. has been stored a poem of "Snow" in *E. coli*, *yeast* and *Arabidopsis*. The sequence  
206 of was "Snow" was 2448 base (2.448 Kbp).

207
