# Supplementary material for: A mixed culture of bacterial cells enables an economic DNA storage on a large scale
Source: PubMed Central journal article supplement (PMC7395121; doi:10.1038/s42003-020-01141-7), 2020-07-31
Supplement: 42003_2020_1141_MOESM2_ESM.pdf [file 42003_2020_1141_MOESM2_ESM.pdf]

## **Description of Additional Supplementary Files**

**File Name: Supplementary Data File**

**Description:** This excel document contains all primary source data used for preparing Figs. 2b, 2c, 2d, 3b, 3c, 3d, 3e, 4, Table 1 and Supplementary Figs. 11, 12, 13, 14, 15, 17, 18, 19, 20, 21, 22, 23, 24 and Supplementary Table 2, 3.
